# Supplementary material for: Transparent, stretchable, and conductive SWNT films using supramolecular functionalization and layer-by-layer self-assembly
Source: Royal Society of Chemistry journal article supplement (doi:10.1039/c6ra02629j), 2016-01-01
Supplement: c6ra02629j1.pdf [file c6ra02629j1.pdf]

Supporting Information

# Transparent, Stretchable, and Conductive SWNT Films Using Supramolecular Functionalization and Layer-by-Layer Self-Assembly

*Akhil Vohra,<sup>†</sup> Patigul Imin,<sup>‡</sup> Mokhtar Imit,<sup>‡</sup> R. Stephen Carmichael,<sup>†</sup> Jagan S. Meena, Alex  
Adronov,<sup>‡\*</sup> Tricia Breen Carmichael<sup>†\*</sup>*

<sup>†</sup>Department of Chemistry and Biochemistry, University of Windsor, Windsor, Ontario, Canada

<sup>‡</sup>Department of Chemistry and Chemical Biology, McMaster University, Hamilton, Ontario,

tbcarmic@uwindsor.ca

| Number of Bilayers | Sheet Resistance $R_s$ (k $\Omega$ / $\square$ ) | Transmittance at 550 nm (%) |
|--------------------|--------------------------------------------------|-----------------------------|
| 1                  | 153.37 $\pm$ 24.86                               | 98.3                        |
| 5                  | 17.98 $\pm$ 1.45                                 | 94.2                        |
| 10                 | 6.95 $\pm$ 0.26                                  | 89.6                        |
| 15                 | 4.20 $\pm$ 0.29                                  | 86.2                        |
| 20                 | 2.84 $\pm$ 0.10                                  | 82.7                        |
| 25                 | 0.56 $\pm$ 0.09                                  | 76.9                        |

**Table S1:** Sheet resistance and percent transmittance (at 550 nm) of CPE- SWNT bilayers on PDMS.
